# Supplementary material for: The Genetic Architecture of Seed Composition in Soybean Is Refined by Genome-Wide Association Scans Across Multiple Populations
Source: PubMed Central journal article supplement (PMC4232554; doi:10.1534/g3.114.013433), 2014-09-22
Supplement: supp_g3.114.013433_FigureS2.pdf [file supp_g3.114.013433_FigureS2.pdf]

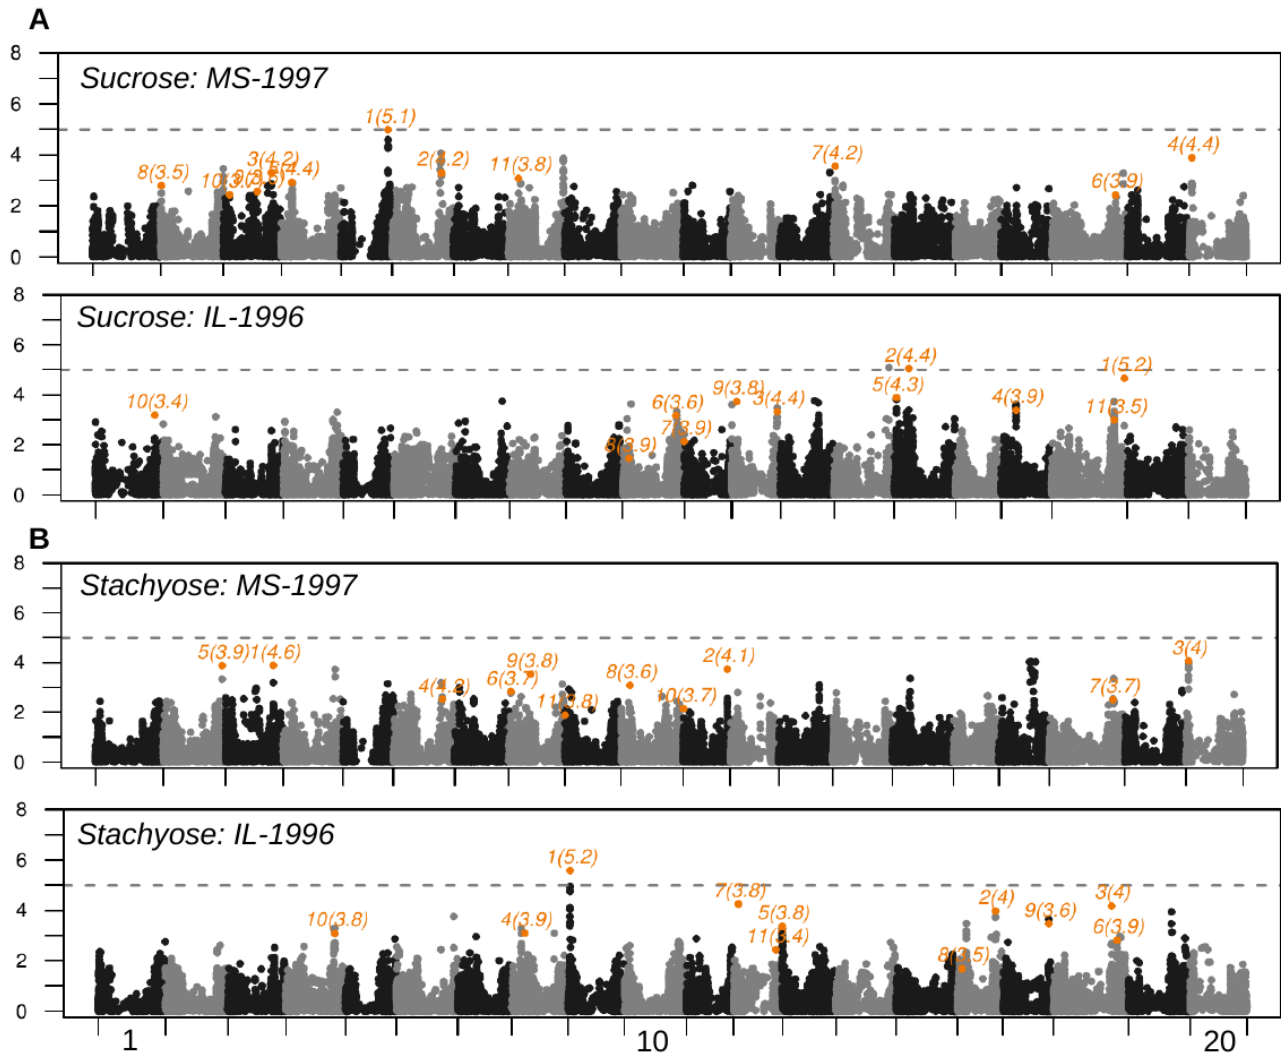

Figure S2: GWA scan results for sucrose and stachyose levels in environment/population datasets MS-1997 and IL-1996. Each marker is plotted with its  $-\log(p\text{-val})$ , as assessed using the CMLM method, on the y-axis and its physical position on the x-axis. Orange coloration indicates markers also identified by the MLMM method; their rank and  $-\log(p\text{-val})$  are also indicated in adjacent orange font. Chromosomes are indicated by alternating black and gray coloration and are plotted in order, 1 through 20. A significance threshold of  $p\text{-val} < 10^{-5}$  is indicated by a dotted line; though arbitrarily chosen, it allows comparison across all GWAS scans in this study. A) Sucrose. B) Stachyose.
