# Supplementary material for: The Genetic Architecture of Seed Composition in Soybean Is Refined by Genome-Wide Association Scans Across Multiple Populations
Source: PubMed Central journal article supplement (PMC4232554; doi:10.1534/g3.114.013433), 2014-09-22
Supplement: supp_g3.114.013433_FigureS4.pdf [file supp_g3.114.013433_FigureS4.pdf]

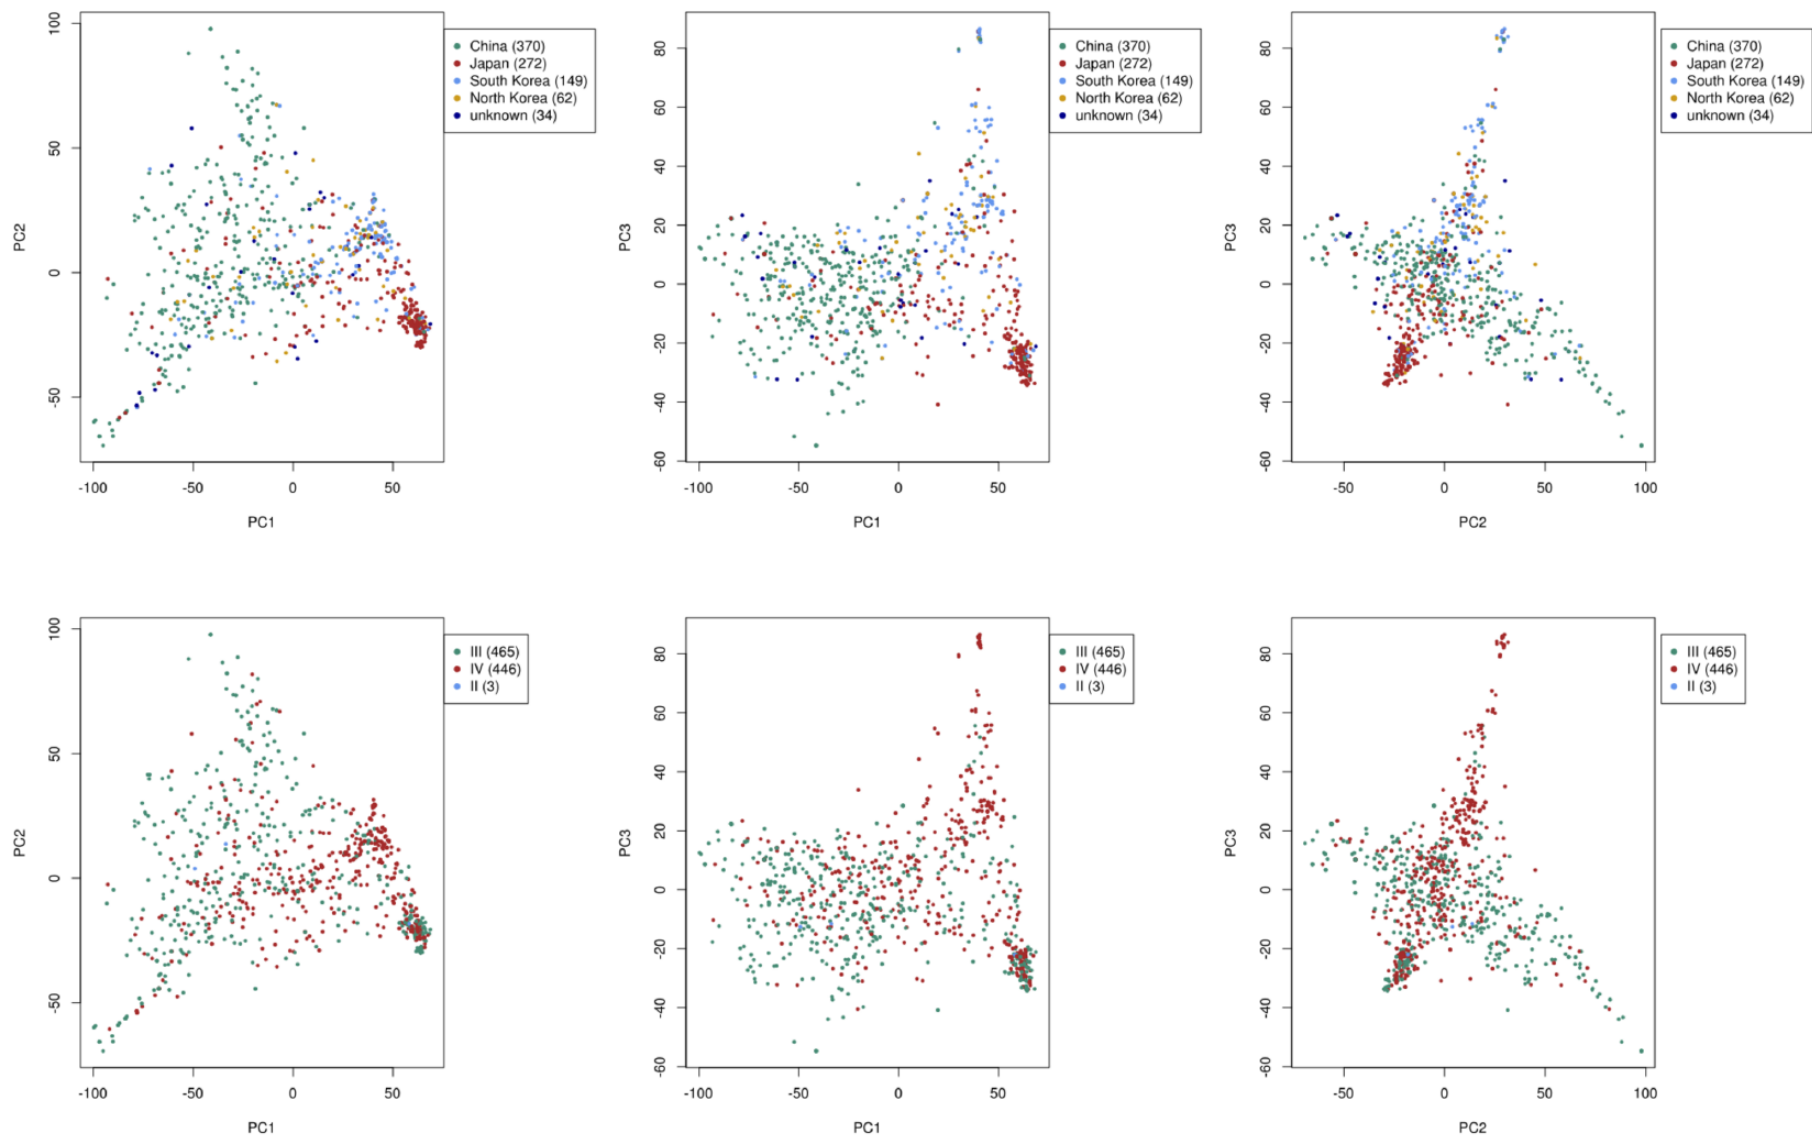

Figure S4: Principal component analysis (PCA) plots based on SNP information in the IL-1966 population used for protein and oil GWAS. Country of origin is indicated in the top row. Maturity group is indicated in the bottom row.
