# Supplementary material for: The Genetic Architecture of Seed Composition in Soybean Is Refined by Genome-Wide Association Scans Across Multiple Populations
Source: PubMed Central journal article supplement (PMC4232554; doi:10.1534/g3.114.013433), 2014-09-22
Supplement: supp_g3.114.013433_FigureS7.pdf [file supp_g3.114.013433_FigureS7.pdf]

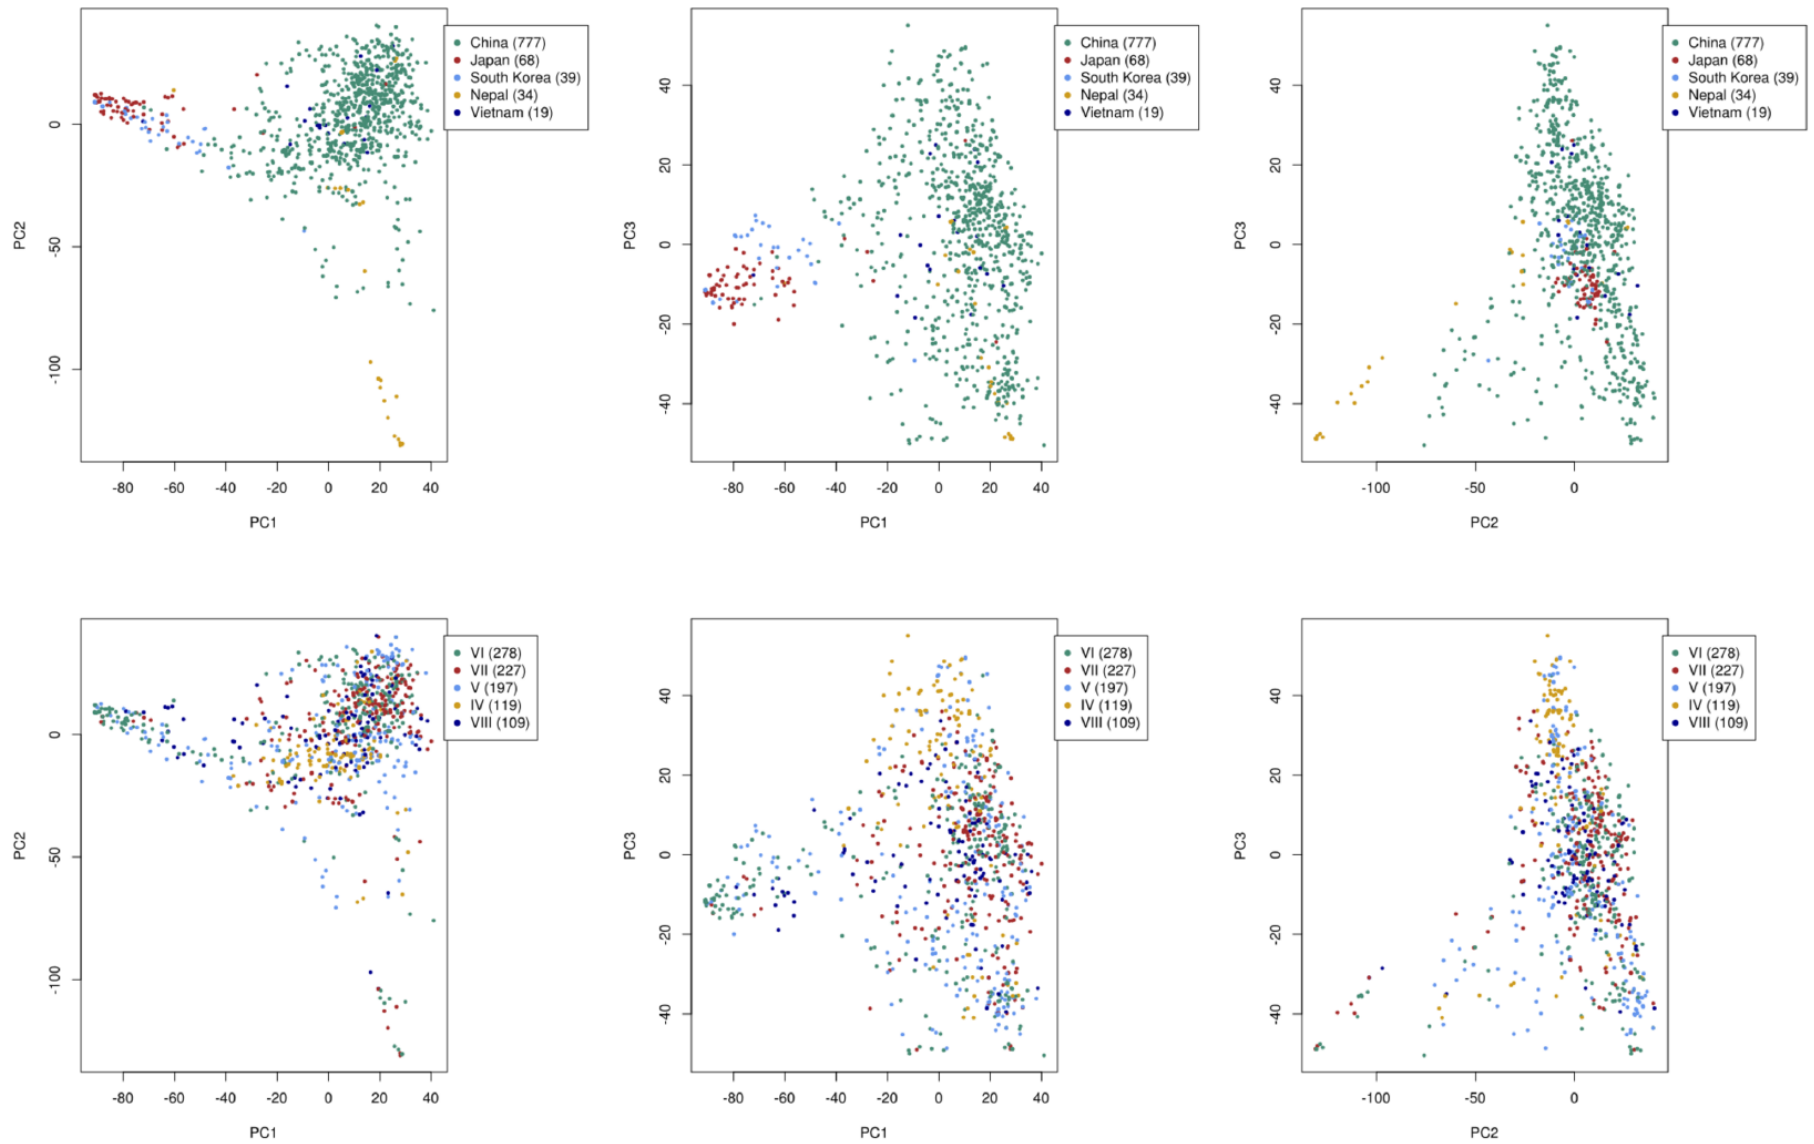

Figure S7: PCA plots based on SNP information in the MS-1997 population used for amino acid GWAS. Country of origin is indicated in the top row. Maturity group is indicated in the bottom row.
