# Supplementary material for: The Genetic Architecture of Seed Composition in Soybean Is Refined by Genome-Wide Association Scans Across Multiple Populations
Source: PubMed Central journal article supplement (PMC4232554; doi:10.1534/g3.114.013433), 2014-09-22
Supplement: supp_g3.114.013433_TableS1.pdf [file supp_g3.114.013433_TableS1.pdf]

Table S1. Phenotyping locations and dates for all populations reported in this study. Populations within a particular “traits analyzed” category do not overlap with regard to genotype.

| Traits analyzed                            | Population name | Location       | Replication structure        | Number of genotypes | Number of SNPs used |
|--------------------------------------------|-----------------|----------------|------------------------------|---------------------|---------------------|
| Protein and oil                            | IL-1964         | Urbana, IL     | 1964(2), average             | 619                 | 32,396              |
|                                            | IL-1966         | Urbana, IL     | 1965(1) & 1966(1), average   | 977                 | 33,265              |
|                                            | MS-1996         | Stoneville, MS | 1996(1) and 1997(1), average | 728                 | 32,328              |
|                                            | MS-2000         | Stoneville, MS | 1999(1) & 2001(1), average   | 934                 | 28,622              |
| Met, Cys, Lys, Thr, sucrose, and stachyose | IL-1996         | Urbana, IL     | 1996(1)                      | 900                 | 34,479              |
|                                            | MS-1997         | Stoneville, MS | 1997(1)                      | 978                 | 32,112              |

<sup>a</sup> Value in parentheses is the number of replications phenotyped in that year
